# Supplementary material for: Unconventional synthesis of Cu–Au dendritic nanowires with enhanced electrochemical activity
Source: Royal Society of Chemistry journal article supplement (doi:10.1039/c5ra23362c), 2015-12-18
Supplement: c5ra23362c1.pdf [file c5ra23362c1.pdf]

## Supplementary information

# Unconventional Synthesis of Cu-Au Dendritic Nanowires with Enhanced Electrochemical Activity

*Yuan Chen,<sup>a</sup> Qingchi Xu,<sup>a, b</sup> Bo Hu<sup>a</sup> Jun Xu<sup>\*a, b</sup> and Jian Weng<sup>a</sup>*

<sup>a</sup> Department of Biomaterials and Department of Physics, Xiamen University, Xiamen, 361005, P.R. China

<sup>b</sup> Research Institute for Biomimetics and Soft Matter, Xiamen University, Xiamen, 361005, P.R. China

\* Corresponding author: [xujun@xmu.edu.cn](mailto:xujun@xmu.edu.cn)

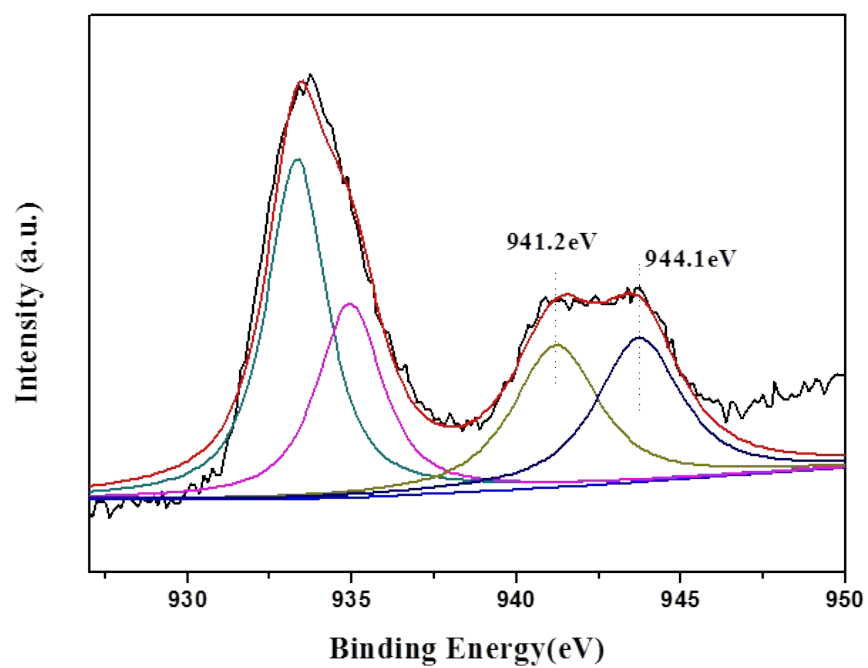

**Supplementary Figure S1** | Cu 2p XPS spectra of Cu-Au dendritic NWs, confirming the valence state of Cu.

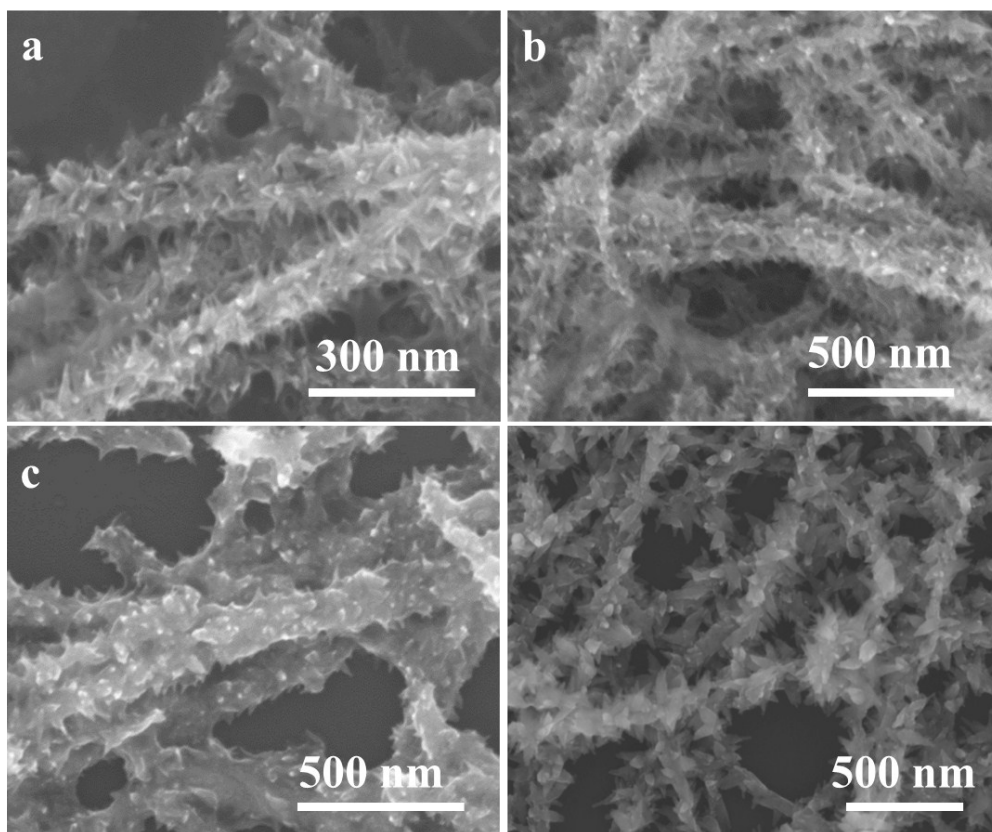

**Supplementary Figure S2** | SEM images of as-synthesized Cu-Au dendritic NWs with different surfactants. Anionic surfactant (a) sodium dodecyl sulfate (SDS), polymer surfactant (b) polyacrylic acid, (c) polyvinylpyrrolidone (PVP) and neutral surfactant (d) TritonX-100.

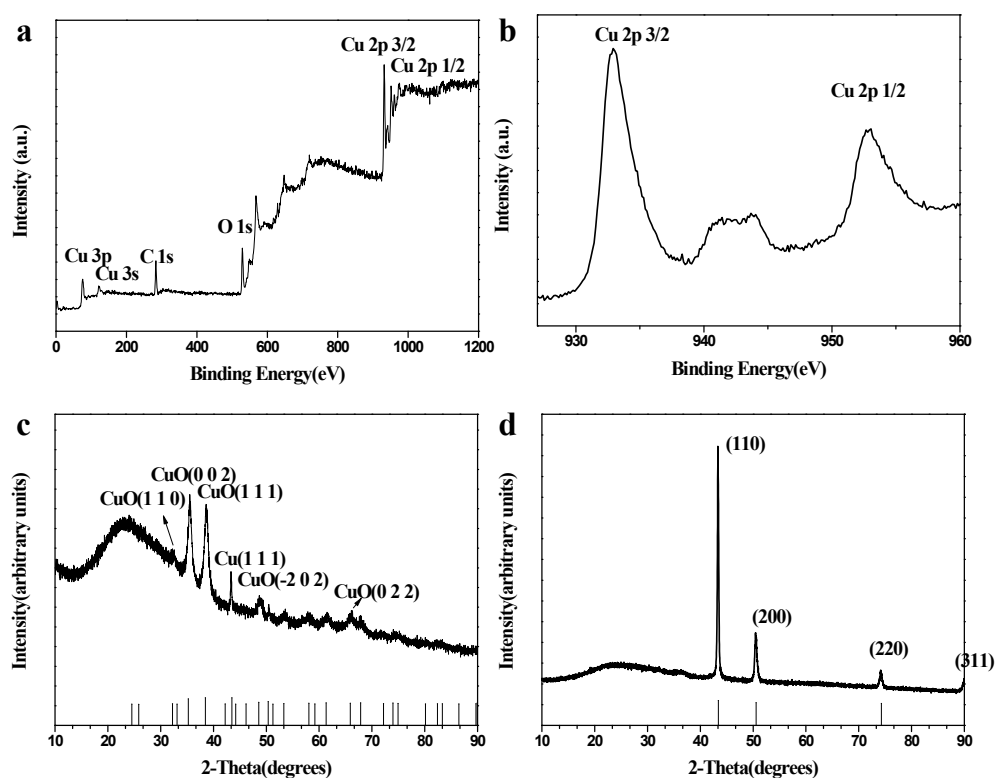

**Supplementary Figure S3** | X-ray photoelectron spectra (XPS) and X-Ray Diffraction (XRD) patterns of Cu dendritic nanostructure. (a, b) XPS and (c) XRD pattern of the as-synthesized Cu dendritic nanostructure. (d) XRD pattern of the Cu NWs.

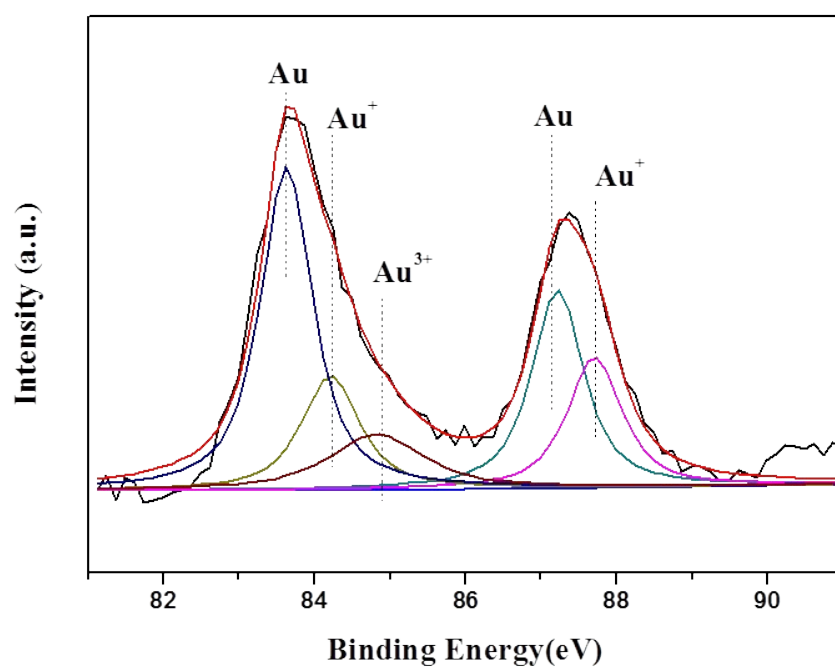

**Supplementary Figure S4** | Confirm the valence state of Au. Au 4f XPS spectra of Au NWs.

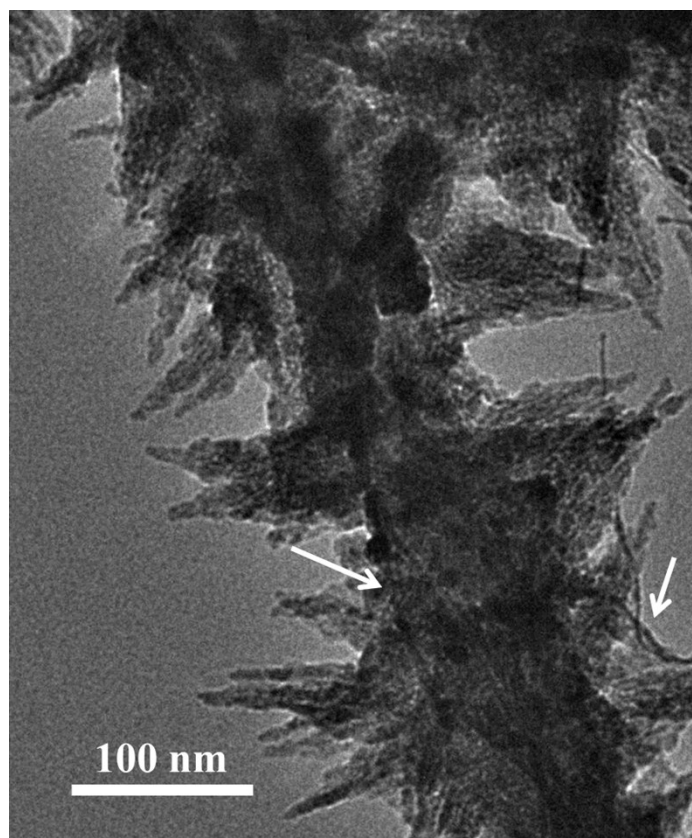

**Supplementary Figure S5** | TEM image of the as-synthesized Cu-Au dendritic NWs.

The arrows indicate broken Au NW bundles.

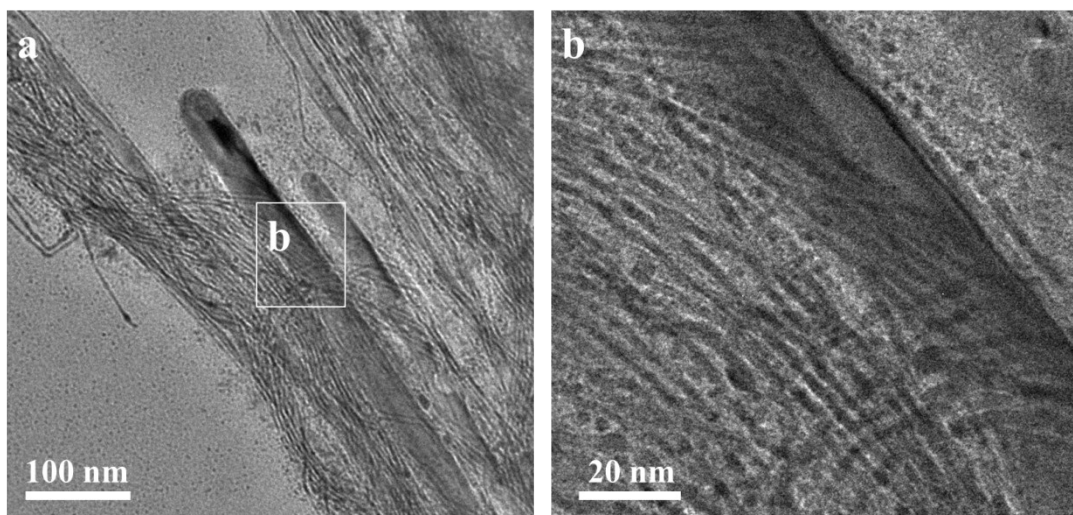

**Supplementary Figure S6** | TEM images of the product after placing Cu NWs and Au NWs with surfactant for 2h at room temperature. (a). (b) High magnification TEM image of highlighted areas in (a).

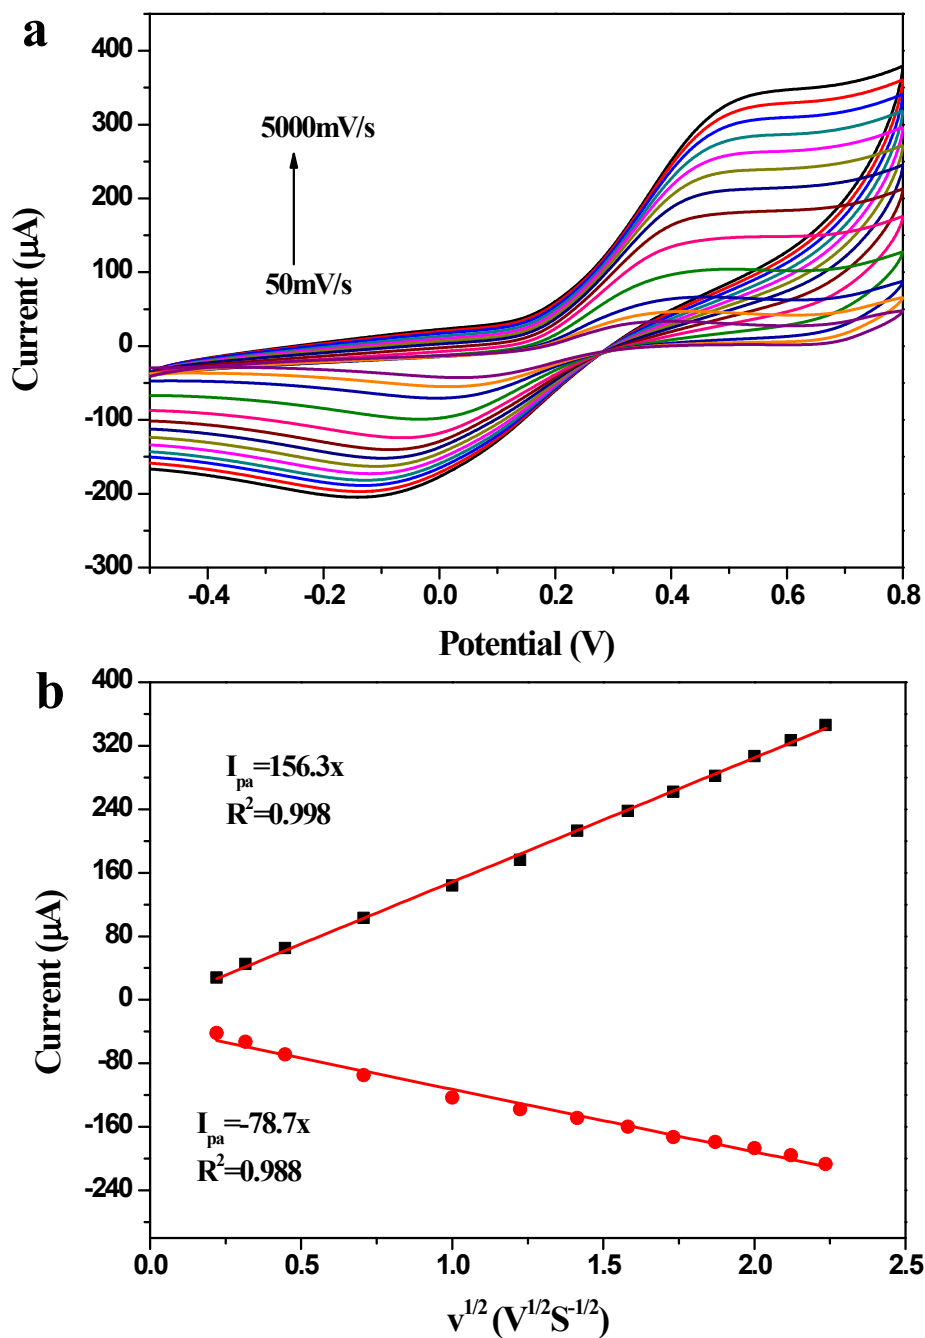

**Supplementary Figure S7** | Calculation of sensitivity of glucose detection with Cu-Au dendritic NWs modified electrode. (a) Cyclic voltammograms (CVs) of Cu-Au dendritic structure in 5mM  $\text{K}_3\text{Fe}(\text{CN})_6$  with different scan rates from 0.05V~5V  $\text{s}^{-1}$ . (b) Plots of anodic and cathodic peak currents vs. square root of scan rate.

CVs in 5mM  $\text{K}_3\text{Fe}(\text{CN})_6$  were used to estimate electrochemically active surface area (ESA).

$$i_p/A=(2.69 \times 10^5) \cdot n^{3/2} \cdot D_0^{1/2} \cdot C_0 \cdot v^{1/2} \quad (1)$$

where  $i_p$ ,  $n$ ,  $D_0$ ,  $C_0$ ,  $v$  are oxidation or reduction peak current, electron transfer number, diffusion coefficient ( $0.76 \times 10^{-5} \text{ cm}^2 \text{ s}^{-1}$ ), initial concentration of  $\text{K}_3\text{Fe}(\text{CN})_6$  ( $5 \times 10^{-6} \text{ mol cm}^{-3}$ ), and scan rate, respectively.  $A$  is ESA, calculated to be  $0.032 \text{ cm}^2$ .

Slope of the curve from Fig.5d of the main article divided by ESA gives the electrode calculated sensitivity of  $32.18 \mu\text{A mM}^{-1} \text{ cm}^{-2}$ .
